# Supplementary material
Source: PubMed Central journal article supplement (PMC2293168)
Supplement: aem_74_8_2267__1.pdf [file aem_74_8_2267__1.pdf]

TABLE S1. Summary of performed physiological experiments with denitrifying strain EbN1. Tested concentrations of aromatic solvents and their effect on growth rate and maximum optical density in alkylbenzene- and succinate-utilizing cultures are displayed. Determined semi-inhibitory (about 50% growth inhibition) concentrations are highlighted in grey.

| Solvent concentration<br>[mM]      | Alkylbenzene-utilizing cultures |                 |                               |                 | Succinate-utilizing cultures after exposure to <sup>a</sup> |                 |                               |                 |                               |                 |                               |                 |                               |                 |
|------------------------------------|---------------------------------|-----------------|-------------------------------|-----------------|-------------------------------------------------------------|-----------------|-------------------------------|-----------------|-------------------------------|-----------------|-------------------------------|-----------------|-------------------------------|-----------------|
|                                    | Ethylbenzene                    |                 | Toluene                       |                 | Ethylbenzene                                                |                 | Toluene                       |                 | <i>p</i> -Cresol              |                 | Phenol                        |                 | Solvent mixture               |                 |
|                                    | $\mu^b$<br>(h <sup>-1</sup> )   | OD <sup>c</sup> | $\mu^b$<br>(h <sup>-1</sup> ) | OD <sup>c</sup> | $\mu^b$<br>(h <sup>-1</sup> )                               | OD <sup>c</sup> | $\mu^b$<br>(h <sup>-1</sup> ) | OD <sup>c</sup> | $\mu^b$<br>(h <sup>-1</sup> ) | OD <sup>c</sup> | $\mu^b$<br>(h <sup>-1</sup> ) | OD <sup>c</sup> | $\mu^b$<br>(h <sup>-1</sup> ) | OD <sup>c</sup> |
| <u>Ethylbenzene<sup>d</sup></u>    |                                 |                 |                               |                 |                                                             |                 |                               |                 |                               |                 |                               |                 |                               |                 |
| 0.02                               | 0.009                           | 0.34            |                               |                 |                                                             |                 |                               |                 |                               |                 |                               |                 |                               |                 |
| 0.08                               | 0.017                           | 0.35            |                               |                 |                                                             |                 |                               |                 |                               |                 |                               |                 |                               |                 |
| 0.21                               | 0.012                           | 0.30            |                               |                 |                                                             |                 |                               |                 |                               |                 |                               |                 |                               |                 |
| <b>0.32</b>                        | <b>0.007</b>                    | <b>0.21</b>     |                               |                 |                                                             |                 |                               |                 |                               |                 |                               |                 |                               |                 |
| 0.40                               | 0.004                           | 0.32            |                               |                 |                                                             |                 |                               |                 |                               |                 |                               |                 |                               |                 |
| 0.48                               | 0.001                           | 0.11            |                               |                 |                                                             |                 |                               |                 |                               |                 |                               |                 |                               |                 |
| <u>Toluene<sup>d</sup></u>         |                                 |                 |                               |                 |                                                             |                 |                               |                 |                               |                 |                               |                 |                               |                 |
| 0.07                               |                                 |                 | 0.012                         | 0.33            |                                                             |                 |                               |                 |                               |                 |                               |                 |                               |                 |
| 0.24                               |                                 |                 | 0.015                         | 0.32            |                                                             |                 |                               |                 |                               |                 |                               |                 |                               |                 |
| <b>0.74</b>                        |                                 |                 | <b>0.003</b>                  | <b>0.35</b>     |                                                             |                 |                               |                 |                               |                 |                               |                 |                               |                 |
| 0.86                               |                                 |                 | 0.001                         | 0.10            |                                                             |                 |                               |                 |                               |                 |                               |                 |                               |                 |
| <u>Ethylbenzene<sup>e</sup></u>    |                                 |                 |                               |                 |                                                             |                 |                               |                 |                               |                 |                               |                 |                               |                 |
| 0.3                                |                                 |                 |                               |                 | 0.035                                                       | 0.50            |                               |                 |                               |                 |                               |                 |                               |                 |
| 0.4                                |                                 |                 |                               |                 | 0.038                                                       | 0.45            |                               |                 |                               |                 |                               |                 |                               |                 |
| <b>0.5</b>                         |                                 |                 |                               |                 | <b>0.016</b>                                                | <b>0.33</b>     |                               |                 |                               |                 |                               |                 |                               |                 |
| 0.6                                |                                 |                 |                               |                 | 0.004                                                       | 0.21            |                               |                 |                               |                 |                               |                 |                               |                 |
| <u>Toluene<sup>e</sup></u>         |                                 |                 |                               |                 |                                                             |                 |                               |                 |                               |                 |                               |                 |                               |                 |
| 0.7                                |                                 |                 |                               |                 |                                                             |                 | 0.038                         | 0.51            |                               |                 |                               |                 |                               |                 |
| 1.0                                |                                 |                 |                               |                 |                                                             |                 | 0.025                         | 0.34            |                               |                 |                               |                 |                               |                 |
| <b>1.2</b>                         |                                 |                 |                               |                 |                                                             |                 | <b>0.014</b>                  | <b>0.31</b>     |                               |                 |                               |                 |                               |                 |
| 1.5                                |                                 |                 |                               |                 |                                                             |                 | 0.008                         | 0.26            |                               |                 |                               |                 |                               |                 |
| 3.0                                |                                 |                 |                               |                 |                                                             |                 | 0.000                         | 0.13            |                               |                 |                               |                 |                               |                 |
| <u><i>p</i>-Cresol<sup>e</sup></u> |                                 |                 |                               |                 |                                                             |                 |                               |                 |                               |                 |                               |                 |                               |                 |
| 2.0                                |                                 |                 |                               |                 |                                                             |                 |                               |                 | 0.035                         | 0.40            |                               |                 |                               |                 |
| 2.5                                |                                 |                 |                               |                 |                                                             |                 |                               |                 | 0.031                         | 0.39            |                               |                 |                               |                 |
| <b>3.0</b>                         |                                 |                 |                               |                 |                                                             |                 |                               |                 | <b>0.026</b>                  | <b>0.33</b>     |                               |                 |                               |                 |
| 3.5                                |                                 |                 |                               |                 |                                                             |                 |                               |                 | 0.015                         | 0.24            |                               |                 |                               |                 |
| 4.0                                |                                 |                 |                               |                 |                                                             |                 |                               |                 | 0.002                         | 0.2             |                               |                 |                               |                 |
| <u>Phenol<sup>e</sup></u>          |                                 |                 |                               |                 |                                                             |                 |                               |                 |                               |                 |                               |                 |                               |                 |
| 5.0                                |                                 |                 |                               |                 |                                                             |                 |                               |                 |                               |                 | 0.034                         | 0.57            |                               |                 |
| 6.0                                |                                 |                 |                               |                 |                                                             |                 |                               |                 |                               |                 | 0.027                         | 0.44            |                               |                 |
| <b>6.5</b>                         |                                 |                 |                               |                 |                                                             |                 |                               |                 |                               |                 | <b>0.022</b>                  | <b>0.38</b>     |                               |                 |
| 7.0                                |                                 |                 |                               |                 |                                                             |                 |                               |                 |                               |                 | 0.015                         | 0.29            |                               |                 |
| 8.0                                |                                 |                 |                               |                 |                                                             |                 |                               |                 |                               |                 | 0.003                         | 0.21            |                               |                 |
| <u>Solvent mixture<sup>f</sup></u> |                                 |                 |                               |                 |                                                             |                 |                               |                 |                               |                 |                               |                 |                               |                 |
| 1.9                                |                                 |                 |                               |                 |                                                             |                 |                               |                 |                               |                 |                               |                 | 0.025                         | 0.39            |
| 2.5                                |                                 |                 |                               |                 |                                                             |                 |                               |                 |                               |                 |                               |                 | 0.019                         | 0.35            |
| 2.6                                |                                 |                 |                               |                 |                                                             |                 |                               |                 |                               |                 |                               |                 | 0.017                         | 0.33            |
| <b>2.7</b>                         |                                 |                 |                               |                 |                                                             |                 |                               |                 |                               |                 |                               |                 | <b>0.014</b>                  | <b>0.30</b>     |
| 2.9                                |                                 |                 |                               |                 |                                                             |                 |                               |                 |                               |                 |                               |                 | 0.003                         | 0.24            |
| 3.0                                |                                 |                 |                               |                 |                                                             |                 |                               |                 |                               |                 |                               |                 | 0.001                         | 0.19            |

<sup>a</sup> Succinate-adapted, actively growing cultures of strain EbN1 were shocked with ethylbenzene, toluene, *p*-cresol or phenol as single solvents and with a mixture of these four during early linear growth. The growth rate of untreated, succinate-utilizing cultures was essentially constant (0.053 h<sup>-1</sup>). The maximum optical density varied around an average of 0.51.

<sup>b</sup> The growth rate corresponds to the slope in the linear range of monitored time courses of growth.

<sup>c</sup> OD refers to the maximum optical density (at 660 nm) at the transition into stationary growth phase (alkylbenzene-utilizing cells) or at the end of the incubation time (succinate-utilizing cells).

<sup>d</sup> Equilibrium concentrations of the alkylbenzenes in the culture medium, while supplied in an HMN carrier phase. Ethylbenzene: 0.02 mM = 0.5% (v/v); 0.08mM = 2.0% (v/v); 0.21mM = 5.0% (v/v); 0.32 mM = 8.0% (v/v) and 0.48 mM = 12% (v/v). Toluene: 0.07 mM = 0.5% (v/v); 0.24 mM = 2.0% (v/v); 0.74 mM = 5.5 % (v/v) and 0.86 mM = 6.0% (v/v).

<sup>e</sup> Concentration of single solvents in the culture medium.

<sup>f</sup> The indicated concentrations refer to the total solvent concentration in the culture medium containing ethylbenzene, toluene, *p*-cresol and phenol.

TABLE S2. Fold changes in abundance of identified proteins during anaerobic growth of strain EbN1 with low and semi-inhibitory concentrations of ethylbenzene and toluene.

| Protein name <sup>a</sup>               | Predicted function <sup>a</sup>                                               | Score <sup>b</sup> | Ethylbenzene [mM] <sup>c</sup> |                   | Toluene [mM] <sup>c</sup> |                   |
|-----------------------------------------|-------------------------------------------------------------------------------|--------------------|--------------------------------|-------------------|---------------------------|-------------------|
|                                         |                                                                               |                    | 0.08 <sup>d</sup>              | 0.32 <sup>d</sup> | 0.07 <sup>e</sup>         | 0.74 <sup>e</sup> |
| <u>Denitrification/Respiration</u>      |                                                                               |                    |                                |                   |                           |                   |
| NirS                                    | Cytochrome <i>cdl</i> nitrite reductase precursor                             | 328                | -1.3                           | 3.0               | -2.3                      | 3.2               |
| FdhA (EbA2936)                          | Formate dehydrogenase, $\alpha$ -subunit                                      | 117                | 1.2                            | 1.6               | 1.1                       | 4.0               |
| UbiE                                    | Ubiquinone/menaquinone biosynthesis methyltransferase                         | 90                 | 2.5                            | 1.1               | 1.2                       | 1.4               |
| <u>Ethylbenzene degradation pathway</u> |                                                                               |                    |                                |                   |                           |                   |
| EbdA                                    | Ethylbenzene dehydrogenase, $\alpha$ -subunit                                 | 43                 | 2.1                            | -1.3              | 1.1                       | 2.7               |
| EbdB                                    | Ethylbenzene dehydrogenase, $\beta$ -subunit                                  | 285                | 1.4                            | -1.1              | 1.3                       | 3.6               |
| EbdC                                    | Ethylbenzene dehydrogenase, $\gamma$ -subunit                                 | 89                 | 1.2                            | 1.1               | -1.1                      | 2.8               |
| EbdD                                    | Ethylbenzene dehydrogenase, chaperone                                         | n.d.               | -1.4                           | -1.8              | -1.3                      | 1.3               |
| C1A68                                   | Hypothetical protein, related to ethylbenzene degradation                     | 292                | 1.2                            | -1.1              | 1.0                       | 3.0               |
| C1A84                                   | Hypothetical protein, related to ethylbenzene degradation                     | n.d.               | -2.1                           | 1.6               | -1.3                      | 3.6               |
| Bal                                     | Benzoylacetate CoA-ligase                                                     | n.d.               | 1.1                            | -2.3              | -1.1                      | 1.8               |
| Apc1                                    | Acetophenone carboxylase, subunit 1                                           | n.d.               | -1.1                           | -2.4              | -1.0                      | 1.7               |
| Apc3                                    | Acetophenone carboxylase, subunit 3                                           | n.d.               | 1.1                            | -1.9              | -1.1                      | 1.6               |
| Apc4                                    | Acetophenone carboxylase, subunit 4                                           | n.d.               | -1.1                           | -1.6              | 1.5                       | 1.8               |
| Apc5                                    | Acetophenone carboxylase, subunit 5                                           | n.d.               | -1.6                           | -1.4              | -1.2                      | 2.0               |
| <u>Toluene degradation pathway</u>      |                                                                               |                    |                                |                   |                           |                   |
| BssA                                    | Benzylsuccinate synthase, $\alpha$ -subunit                                   | 297                | 1.7                            | 1.6               | 1.0                       | 3.3               |
| BssE                                    | Benzylsuccinate synthase, chaperone                                           | 237                | 1.2                            | 2.0               | -1.4                      | 3.1               |
| C2A200                                  | Hypothetical protein, related to toluene degradation                          | 239                | 1.2                            | 1.8               | 1.0                       | 2.8               |
| BbsH                                    | Phenylitaconyl-CoA hydratase                                                  | n.d.               | 1.0                            | -1.3              | -1.3                      | -1.1              |
| BbsG                                    | ( <i>R</i> )-Benzylsuccinyl-CoA dehydrogenase                                 | n.d.               | 1.2                            | -1.0              | 1.1                       | 1.5               |
| BbsF                                    | Succinyl-CoA:( <i>R</i> )-benzylsuccinyl-CoA-transferase, subunit             | n.d.               | 1.9                            | 2.0               | 1.0                       | 1.7               |
| BbsD                                    | 2-[Hydroxy(phenyl)methyl]-succinyl-CoA dehydrogenase, subunit                 | n.d.               | -1.1                           | -1.3              | -1.3                      | -2.4              |
| BbsC                                    | 2-[Hydroxy(phenyl)methyl]-succinyl-CoA dehydrogenase, subunit                 | n.d.               | 1.4                            | -1.7              | -1.2                      | -2.2              |
| BbsB                                    | Benzoylsuccinyl-CoA thiolase, $\beta$ -subunit                                | n.d.               | 1.2                            | 1.1               | -1.3                      | -1.1              |
| BbsA                                    | Benzoylsuccinyl-CoA thiolase, $\alpha$ -subunit                               | n.d.               | -1.1                           | 1.0               | -1.2                      | -1.1              |
| EbA1932                                 | Hypothetical protein, related to toluene degradation                          | n.d.               | 1.4                            | -1.0              | -1.1                      | -1.1              |
| EbA1936                                 | Hypothetical protein, related to toluene degradation                          | n.d.               | 1.2                            | 1.6               | -1.5                      | 1.2               |
| BcrA                                    | Benzoyl-CoA reductase, $\alpha$ -subunit                                      | 275                | 1.3                            | -1.7              | -1.2                      | -3.7              |
| BcrB                                    | Benzoyl-CoA reductase, $\beta$ -subunit                                       | 369                | 1.5                            | -3.1              | 1.0                       | -2.9              |
| <u>Polyhydroxyalkanoate synthesis</u>   |                                                                               |                    |                                |                   |                           |                   |
| PhbB                                    | Acetoacetyl-CoA reductase                                                     | 128                | 1.3                            | 1.3               | 1.2                       | 3.1               |
| PhaC                                    | Putative poly(3-hydroxyalkanoate) synthase                                    | 121                | 1.1                            | 1.0               | 1.5                       | 3.5               |
| EbA1323                                 | Conserved hypothetical protein, predicted phasin family                       | 155                | -2.1                           | 5.7               | -1.5                      | 5.5               |
| EbA6852                                 | Probable phasin                                                               | 126                | -7.6                           | 4.0               | -1.2                      | 27.4              |
| EbA5033                                 | Hypothetical protein, probable phasin                                         | 87                 | 2.4                            | 5.4               | 2.6                       | 6.6               |
| <u>Stress-related proteins</u>          |                                                                               |                    |                                |                   |                           |                   |
| SodB                                    | Superoxide dismutase (Fe)                                                     | 95                 | -2.2                           | 1.6               | 1.1                       | 2.8               |
| EbA1861                                 | Putative high affinity Fe <sup>2+</sup> transporter                           | 71                 | 1.3                            | -9.9              | 2.2                       | -37.3             |
| EbA4918                                 | Putative periplasmic iron binding protein of ABC Fe <sup>3+</sup> transporter | 275                | 1.1                            | -2.6              | 1.3                       | -4.5              |
| AcnA                                    | Aconitase A                                                                   | 194                | 1.0                            | 2.1               | 1.1                       | 5.9               |
| AcnA2                                   | Aconitase A                                                                   | 222                | -1.3                           | 1.8               | -1.1                      | 4.5               |
| BetB                                    | Putative betaine aldehyde dehydrogenase (BADH) oxidoreductase protein         | 190                | -2.0                           | 2.3               | -1.7                      | 3.5               |
| WrbA (EbA2303)                          | Flavoprotein, TrpR enhancer                                                   | 85                 | -1.8                           | 2.4               | -1.1                      | 5.8               |
| AldB                                    | Putative aldehyde dehydrogenase                                               | 73                 | 1.1                            | -1.0              | 1.2                       | 4.0               |
| AdhB                                    | Alcohol dehydrogenase II                                                      | 96                 | 1.0                            | 1.1               | -1.0                      | 4.9               |
| GabD                                    | Succinate-semialdehyde dehydrogenase                                          | 146                | -1.3                           | 1.1               | 1.3                       | 2.6               |
| <u>Metabolism</u>                       |                                                                               |                    |                                |                   |                           |                   |
| AcsA                                    | Acetyl-CoA synthase                                                           | 299                | 1.4                            | 2.0               | -1.1                      | 4.6               |
| EbA6506                                 | Acyl-CoA dehydrogenase                                                        | 386                | -1.3                           | 1.4               | -1.2                      | 2.5               |
| EbA6075                                 | Predicted short chain dehydrogenase                                           | 176                | -3.5                           | 1.7               | -2.8                      | 2.4               |
| EbA6736                                 | Probable oxidoreductase                                                       | 145                | -1.3                           | 2.4               | -1.2                      | 4.6               |
| EbA2755                                 | ABC-transporter, periplasmic component                                        | 145                | 1.1                            | -1.0              | -1.1                      | -2.6              |
| <u>Fatty acid synthesis</u>             |                                                                               |                    |                                |                   |                           |                   |
| AccD                                    | Putative acetyl-CoA carboxylase carboxyl transferase, $\beta$ -subunit        | 158                | -1.1                           | -1.3              | 1.1                       | -2.5              |
| BioB                                    | Biotin synthase protein                                                       | 107                | 1.0                            | -1.6              | -1.1                      | -2.9              |
| EbA4327                                 | Acyl-CoA dehydrogenase                                                        | 93                 | -1.2                           | 2.9               | -1.3                      | 13.4              |

Amino acid synthesis

|      |                                                                                                    |    |      |     |     |     |
|------|----------------------------------------------------------------------------------------------------|----|------|-----|-----|-----|
| HisA | 1-5-(Phosphoribosyl)-5-[(5-phosphoribosylamino)methylideneamino]-imidazole-4-carboxamide isomerase | 87 | -1.1 | 1.8 | 1.2 | 2.5 |
|------|----------------------------------------------------------------------------------------------------|----|------|-----|-----|-----|

Transcription, translation, regulation

|        |                                           |     |      |      |      |      |
|--------|-------------------------------------------|-----|------|------|------|------|
| RplI   | 50S ribosomal protein L9                  | 193 | 1.2  | -1.6 | -1.1 | -2.7 |
| RplY   | 50S ribosomal protein                     | 89  | -1.0 | -1.8 | -1.2 | -2.7 |
| RplA   | 50S ribosomal protein                     | 276 | 2.6  | -1.4 | 1.2  | 1.0  |
| RplF   | 50S ribosomal protein                     | 209 | 3.0  | -1.2 | 1.3  | -1.9 |
| RpsB   | 30S ribosomal protein S2                  | 154 | 1.3  | -1.5 | -1.1 | -2.5 |
| Tsf    | Elongation factor Ts                      | 288 | -1.1 | -1.7 | -1.2 | -3.1 |
| PrkA   | Protein kinase                            | 254 | -1.8 | 1.7  | -1.1 | 3.4  |
| GntR   | Transcriptional regulator                 | 84  | -1.1 | 1.6  | -1.1 | 3.5  |
| Tnp17  | Transposase IS4 family                    | 81  | 2.2  | -1.3 | 1.1  | 2.6  |
| P2A352 | Probable pyridoxamin 5'-phosphate oxidase | 123 | 1.0  | -1.4 | 1.1  | -2.8 |

Unknown, conserved proteins

|         |                                |     |      |      |      |      |
|---------|--------------------------------|-----|------|------|------|------|
| EbA1694 | Conserved hypothetical protein | 56  | -2.2 | 5.1  | -1.2 | 14.3 |
| EbA5146 | Conserved hypothetical protein | 124 | -2.5 | 3.6  | -1.3 | 6.6  |
| EbA3069 | Conserved hypothetical protein | 96  | -1.5 | 2.1  | -1.0 | 2.5  |
| EbA6073 | Conserved hypothetical protein | 141 | -2.6 | 1.5  | -2.1 | 1.8  |
| EbA5028 | Conserved hypothetical protein | 136 | 1.1  | -1.8 | -1.1 | -2.5 |

Unknown, unique proteins

|         |                                                      |     |      |     |      |      |
|---------|------------------------------------------------------|-----|------|-----|------|------|
| EbA7011 | Hypothetical protein                                 | 107 | -2.6 | 6.7 | -1.0 | 66.4 |
| EbA2155 | Hypothetical protein                                 | 116 | 1.1  | 6.7 | -1.0 | 16.0 |
| EbA6953 | Hypothetical protein, probable apolipoprotein A/E/C3 | 288 | -1.6 | 7.4 | -1.1 | 9.5  |
| EbA3088 | Hypothetical protein                                 | 108 | -1.1 | 2.9 | -1.1 | 4.4  |
| EbA1597 | Hypothetical protein                                 | 52  | -1.8 | 1.7 | 1.1  | 2.8  |

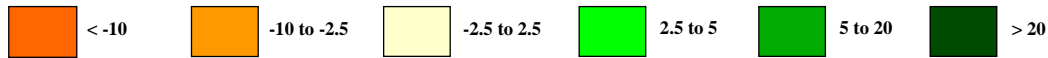

<sup>a</sup> Protein name and function as published by Rabus *et al.* (35). Proteins may fit in more than one group.

<sup>b</sup> Score of MS-based identification as calculated using Mascot. The Mascot score was averaged for proteins identified from several protein spots. n.d., not determined in this study. Protein assignment was based on co-detection of previously identified proteins (28).

<sup>c</sup> Fold changes in abundance were determined with 2D DIGE. Protein extracts from cultures growing with <sup>0</sup>0.21 mM ethylbenzene or <sup>0</sup>0.24 mM toluene served as reference state. Proteins with fold changes > 2.5 are green-colored and proteins with < -2.5 are red-colored, respectively.

TABLE S3. Fold changes in abundance of identified proteins from succinate-utilizing cells of strain EbN1 either shocked with ethylbenzene and toluene, or without addition of the alkylbenzenes.

| Protein name <sup>a</sup>             | Predicted function <sup>a</sup>                                                                                   | Score <sup>b</sup> | Succinate-utilizing cells shocked with |                  |                  |                                  |                  |                  |                          |                  |
|---------------------------------------|-------------------------------------------------------------------------------------------------------------------|--------------------|----------------------------------------|------------------|------------------|----------------------------------|------------------|------------------|--------------------------|------------------|
|                                       |                                                                                                                   |                    | Ethylbenzene <sup>c</sup><br>(0.5 mM)  |                  |                  | Toluene <sup>c</sup><br>(1.2 mM) |                  |                  | No-addition <sup>c</sup> |                  |
|                                       |                                                                                                                   |                    | 45 <sup>d</sup>                        | 250 <sup>d</sup> | 600 <sup>d</sup> | 45 <sup>d</sup>                  | 250 <sup>d</sup> | 600 <sup>d</sup> | 250 <sup>d</sup>         | 600 <sup>d</sup> |
| <u>Stress-related proteins</u>        |                                                                                                                   |                    |                                        |                  |                  |                                  |                  |                  |                          |                  |
| HtpG                                  | Heat shock protein                                                                                                | 142                | 2.3                                    | 2.6              | 2.3              | 2.2                              | 1.9              | 1.9              | -1.1                     | 1.1              |
| EbB88                                 | Putative heat shock protein                                                                                       | 103                | 2.8                                    | 3.3              | 3.0              | 2.8                              | 2.1              | 2.4              | 1.4                      | 1.7              |
| ClpB                                  | Chaperone                                                                                                         | 148                | 2.9                                    | 3.6              | 3.8              | 2.4                              | 2.0              | 2.3              | 1.2                      | 1.5              |
| WbjB                                  | Similar to polysaccharide biosynthesis protein                                                                    | 90                 | 6.5                                    | 4.5              | 1.9              | 4.4                              | 2.0              | 1.9              | 1.2                      | 1.1              |
| KatA                                  | Catalase                                                                                                          | 150                | 1.8                                    | 2.5              | 2.5              | 1.7                              | 1.4              | 1.8              | 4.0                      | 3.9              |
| <u>Denitrification</u>                |                                                                                                                   |                    |                                        |                  |                  |                                  |                  |                  |                          |                  |
| NirS                                  | Cytochrome <i>cdI</i> nitrite reductase precursor                                                                 | 205                | 2.0                                    | 2.3              | 1.8              | 2.1                              | 1.9              | 1.7              | 5.7                      | 5.9              |
| NosZ                                  | Nitrous-oxide reductase precursor                                                                                 | 270                | 4.1                                    | 5.1              | 11.2             | 4.8                              | 5.2              | 7.5              | -1.0                     | 1.3              |
| <u>Metabolism</u>                     |                                                                                                                   |                    |                                        |                  |                  |                                  |                  |                  |                          |                  |
| AcsA                                  | Acetyl-CoA synthetase                                                                                             | 56                 | 2.1                                    | 3.0              | 4.1              | 1.7                              | 1.7              | 2.4              | -1.6                     | -1.2             |
| BcrA                                  | Benzoyl-CoA reductase subunit                                                                                     | 62                 | -1.4                                   | -1.9             | -2.2             | -1.6                             | -3.0             | -4.3             | -1.6                     | -1.6             |
| AceE                                  | Pyruvate dehydrogenase multienzyme complex, E1 component                                                          | 266                | 1.1                                    | -1.1             | -1.2             | -1.0                             | -1.5             | -1.4             | -4.5                     | -1.9             |
| BzdV                                  | Subunit of oxidoreductase of unknown function, conserved in "Aromatoleum"-type benzoate degradation gene clusters | 131                | 1.0                                    | -1.1             | -1.3             | -1.1                             | -1.4             | -1.2             | -3.4                     | -1.8             |
| SucB                                  | 2-Oxoglutarate dehydrogenase complex, dihydrolipoamide succinyltransferase                                        | 74                 | -2.4                                   | -2.7             | -2.8             | -2.5                             | -2.6             | -2.8             | -2.5                     | -2.3             |
| PpcK                                  | Phosphoenolpyruvate carboxykinase                                                                                 | 211                | 1.4                                    | 1.3              | 1.2              | 1.2                              | -1.2             | -1.3             | -3.4                     | -1.3             |
| <u>Sulfur assimilation</u>            |                                                                                                                   |                    |                                        |                  |                  |                                  |                  |                  |                          |                  |
| CysP                                  | Periplasmic thiosulfate-binding protein                                                                           | 118                | -4.2                                   | -4.2             | -6.3             | -4.2                             | -4.8             | -7.3             | -3.2                     | -3.2             |
| CysD                                  | Putative ATP sulfurylase small subunit                                                                            | 120                | -3.3                                   | -2.9             | -2.7             | -2.8                             | -3.3             | -3.2             | -3.0                     | -3.1             |
| CysN                                  | ATP sulfurylase large subunit                                                                                     | 126                | -3.8                                   | -4.0             | -4.5             | -3.8                             | -4.5             | -5.1             | -4.5                     | -4.0             |
| CysH                                  | APS-reductase                                                                                                     | 179                | -4.7                                   | -5.2             | -5.6             | -4.0                             | -4.5             | -4.8             | -4.0                     | -3.9             |
| <u>Proteins with unknown function</u> |                                                                                                                   |                    |                                        |                  |                  |                                  |                  |                  |                          |                  |
| EbA2621                               | Conserved hypothetical protein                                                                                    | 54                 | -1.6                                   | -1.6             | -1.7             | -1.5                             | -1.6             | -1.5             | -2.9                     | -2.4             |
| EbA3357                               | Hypothetical protein                                                                                              | 54                 | 1.1                                    | 1.7              | 1.7              | 1.2                              | 1.0              | 1.2              | 3.1                      | 3.4              |
| EbA4221                               | Hypothetical protein                                                                                              | 63                 | 2.4                                    | 2.7              | 1.6              | 2.3                              | 2.4              | 1.6              | 2.1                      | 2.2              |

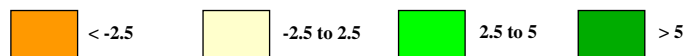

<sup>a</sup>Protein name and function as published by Rabus *et al.* (35). Proteins may fit in more than one group.

<sup>b</sup>Score of MS-based identification as calculated using Mascot. The Mascot score was averaged for proteins identified from several protein spots.

<sup>c</sup>Fold changes in abundance were determined with 2D DIGE. Protein extracts from succinate-utilizing cultures harvested 45 min after addition of the alkylbenzenes to the test cultures served as reference state. Proteins with fold changes > 2.5 are green-colored and proteins with < -2.5 are red-colored, respectively.

<sup>d</sup>Time after addition of the alkylbenzenes to the test cultures.

TABLE S4. Fold changes in abundance of identified proteins from succinate-utilizing cultures of strain EbN1 shocked with semi-inhibitory concentrations of *p*-cresol, phenol or the solvent mixture.

| Protein name <sup>a</sup>       | Predicted function <sup>a</sup>                                                    | Score <sup>b</sup> | Succinate-utilizing cells shocked with    |                  |                                 |                  |                                                        |                  |
|---------------------------------|------------------------------------------------------------------------------------|--------------------|-------------------------------------------|------------------|---------------------------------|------------------|--------------------------------------------------------|------------------|
|                                 |                                                                                    |                    | <i>p</i> -Cresol <sup>c</sup><br>(3.0 mM) |                  | Phenol <sup>c</sup><br>(6.5 mM) |                  | Solvent mixture <sup>c</sup><br>(2.7 mM <sup>d</sup> ) |                  |
|                                 |                                                                                    |                    | 45 <sup>e</sup>                           | 250 <sup>e</sup> | 45 <sup>e</sup>                 | 250 <sup>e</sup> | 45 <sup>e</sup>                                        | 250 <sup>e</sup> |
| <u>Denitrification</u>          |                                                                                    |                    |                                           |                  |                                 |                  |                                                        |                  |
| NirS                            | Cytochrome <i>cdI</i> nitrite reductase precursor                                  | 238                | 1.2                                       | 1.7              | -1.4                            | 1.1              | 1.7                                                    | 3.0              |
| NorQ                            | Putative chaperone required for nitric oxide reductase                             | 90                 | -1.3                                      | 1.0              | -1.6                            | 1.0              | 1.6                                                    | 2.6              |
| NosZ                            | Nitrous oxide reductase precursor                                                  | 95                 | 1.1                                       | 1.9              | 1.6                             | 2.0              | 2.1                                                    | 2.6              |
| <u>Ethylbenzene degradation</u> |                                                                                    |                    |                                           |                  |                                 |                  |                                                        |                  |
| Apc1                            | Acetophenone carboxylase, subunit 1                                                | 193                | -                                         | -                | -                               | -                | 1.7                                                    | 5.9              |
| Apc3                            | Acetophenone carboxylase, subunit 3                                                | 270                | -                                         | -                | -                               | -                | -1.5                                                   | 2.6              |
| Apc4                            | Acetophenone carboxylase, subunit 4                                                | 98                 | -                                         | -                | -                               | -                | -1.3                                                   | 6.1              |
| Orf84                           | Putative methyltransferase                                                         | 75                 | -                                         | -                | -                               | -                | 1.0                                                    | 8.3              |
| <u>Stress-related proteins</u>  |                                                                                    |                    |                                           |                  |                                 |                  |                                                        |                  |
| ClpB                            | Chaperone                                                                          | 361                | 1.2                                       | 2.2              | 1.8                             | 4.1              | 2.4                                                    | 3.4              |
| EbB88                           | Putative heat shock protein                                                        | 97                 | 1.2                                       | 1.5              | 1.4                             | 4.8              | 2.8                                                    | 3.6              |
| EbA2730                         | Heat shock protein (Hsp-20 family)                                                 | 87                 | -                                         | -                | 1.4                             | 4.4              | -                                                      | -                |
| GrpE                            | Putative GrpE protein (Hsp-70 cofactor)                                            | 102                | -                                         | -                | -                               | -                | 1.6                                                    | 4.7              |
| NorVW                           | Nitric oxide reductase (flavorubredoxin NorV) with its associated reductase (NorW) | 176                | -                                         | -                | -1.0                            | 2.4              | 1.2                                                    | 7.0              |
| KatA                            | Catalase                                                                           | 179                | 1.0                                       | 2.0              | -1.5                            | 1.6              | 2.4                                                    | 5.2              |
| Dps                             | DNA-binding ferritin-like protein (oxidative damage protectant)                    | 74                 | 1.7                                       | 2.4              | 1.0                             | 1.3              | 2.0                                                    | 2.5              |
| OmpC                            | Outer membrane protein                                                             | 159                | 11.0                                      | 32.4             | 8.4                             | 21.9             | 6.8                                                    | 23.4             |
| <u>Metabolism</u>               |                                                                                    |                    |                                           |                  |                                 |                  |                                                        |                  |
| AcsA                            | Acetyl-CoA synthetase                                                              | 231                | 2.6                                       | 4.7              | 4.4                             | 13.4             | 3.5                                                    | 5.7              |
| Icd                             | Isocitrate dehydrogenase                                                           | 260                | 1.5                                       | 3.0              | -1.4                            | 2.1              | 2.2                                                    | 4.3              |
| GlcB                            | Malate synthase G                                                                  | 113                | 1.6                                       | 2.6              | 1.8                             | 3.5              | 1.9                                                    | 3.1              |
| ThrC                            | Threonine synthase                                                                 | 230                | 4.3                                       | 1.5              | -1.2                            | -1.3             | 1.6                                                    | 1.4              |
| BoxC                            | Enoyl-CoA-hydratase/isomerase                                                      | 278                | 2.8                                       | 1.2              | 1.0                             | -1.1             | 1.3                                                    | 1.0              |
| DapA                            | Dihydrodipicolinate synthetase                                                     | 61                 | -                                         | -                | 1.1                             | 1.3              | 1.2                                                    | 10.4             |
| GlnA                            | Glutamine synthetase                                                               | 102                | 1.1                                       | 1.2              | -                               | -                | 1.7                                                    | 3.2              |
| RpsB                            | 30S ribosomal protein S2                                                           | 120                | -                                         | -                | -                               | -                | 1.9                                                    | 3.3              |
| KdsA                            | 2-Dehydro-3-deoxyphosphooctonate aldolase (EC 2.5.1.55)                            | 102                | -                                         | -                | -1.2                            | 1.2              | 1.5                                                    | 2.8              |
| RibH                            | 6,7-Dimethyl-8-ribityllumazine synthase (riboflavin synthase)                      | 80                 | -                                         | -                | -1.3                            | 1.1              | 1.5                                                    | 2.5              |
| <u>Others</u>                   |                                                                                    |                    |                                           |                  |                                 |                  |                                                        |                  |
| EbA1033                         | Putative exported solute binding protein                                           | 151                | 2.0                                       | 2.7              | 1.0                             | 1.5              | 1.6                                                    | 2.0              |
| EbA3296                         | Zn-dependent hydrolase                                                             | 126                | -1.0                                      | 1.6              | 1.7                             | 4.3              | 2.4                                                    | 3.3              |
| EbA6075                         | Predicted short chain dehydrogenase                                                | 136                | -1.2                                      | 1.4              | -1.8                            | 1.1              | 1.8                                                    | 3.9              |
| <u>Hypothetical proteins</u>    |                                                                                    |                    |                                           |                  |                                 |                  |                                                        |                  |
| EbA1598                         | Hypothetical protein                                                               | 111                | -                                         | -                | 3.1                             | 3.9              | -                                                      | -                |
| EbA3069                         | Conserved hypothetical protein, probably involved in cell wall turnover            | 116                | 1.6                                       | 2.4              | 1.5                             | 3.2              | 1.7                                                    | 2.5              |
| EbA5766                         | Conserved hypothetical protein                                                     | 104                | 3.9                                       | 4.4              | -                               | -                | 2.3                                                    | 7.4              |
| EbA6073                         | Conserved hypothetical protein                                                     | 101                | -1.1                                      | 1.3              | -1.5                            | 1.1              | 2.0                                                    | 2.9              |
| EbA6294                         | Conserved hypothetical protein                                                     | 92                 | 1.1                                       | 1.5              | -1.3                            | 1.2              | 1.5                                                    | 3.1              |

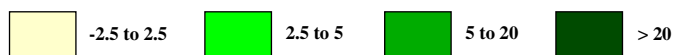

<sup>a</sup> Protein name and function as published by Rabus *et al.* (35). Proteins may fit in more than one group.

<sup>b</sup> Score of MS-based identification as calculated using Mascot. The Mascot score was averaged for proteins identified from several protein spots.

<sup>c</sup> Fold changes in abundance were determined with 2D DIGE. Protein extracts from succinate-utilizing cultures harvested 45 min after addition of the aromatic stressors to the test cultures served as reference state. Proteins with fold changes > 2.5 are green-colored and proteins with < -2.5 are red-colored, respectively.

<sup>d</sup> Total solvent concentration of a mixture of ethylbenzene, toluene, *p*-cresol and phenol in the culture medium.

<sup>e</sup> Time after addition of *p*-cresol, phenol and the solvent mixture to the test cultures.
